# Supplementary material
Source: PubMed Central journal article supplement (PMC5606918)
Supplement: supp_WNL.0000000000004392_e-tables.pdf [file supp_WNL.0000000000004392_e-tables.pdf]

**Supplemental Table e-1. Baseline Characteristics of the Study Participants**

|                                                      | Placebo (N=23)  | Simvastatin (N=26) | P-value     |
|------------------------------------------------------|-----------------|--------------------|-------------|
| <b>Completed, per Protocol</b>                       | <b>21 (91%)</b> | <b>25 (96%)</b>    | <b>0.22</b> |
| Age, years                                           | 56.1 (4.9)      | 55.7 (4.5)         | 0.75        |
| Sex, female                                          | 18 (78%)        | 19 (73%)           | 0.75        |
| Education, years                                     | 17.0 (2.1)      | 16.9 (2.6)         | 0.81        |
| Race, Caucasian                                      | 21 (91%)        | 23 (88%)           | 1.00        |
| Family history of dementia in first degree relatives | 1 (4.3%)        | 4 (15%)            | 0.35        |
| <i>APOEε4 carrier</i>                                | 8 (35%)         | 7 (27%)            | 0.76        |
| Serum LDL, mg/dl                                     | 127 (28)        | 129 (29)           | 0.79        |
| Serum HDL, mg/dl                                     | 78 (20)         | 66 (19)            | 0.04        |
| Serum Triglycerides, mg/dl                           | 98 (43)         | 91 (33)            | 0.53        |
| CSF Aβ <sub>42</sub> , pg/ml                         | 515 (113)       | 520 (114)          | 0.88        |
| CSF total-tau, pg/ml                                 | 43 (17)         | 38 (16)            | 0.32        |
| CSF p-tau <sub>181</sub> , pg/ml                     | 31 (15)         | 27 (10)            | 0.33        |

Mean (standard deviation) shown for continuous variables, number (percentage) shown for categorical variables. Test results (p-value) for difference between treatment groups based on the two-sample t-test for continuous variables and Fisher's exact test for categorical variables.

**Supplemental Table e-2: Neuropsychological test score changes by treatment group**

|                                          | Placebo ( n = 21) |                    | Simvastatin ( n = 25) |                    | p-value * |
|------------------------------------------|-------------------|--------------------|-----------------------|--------------------|-----------|
|                                          | Baseline          | 12-month<br>change | Baseline              | 12-month<br>change |           |
| <b>HVLT-R</b>                            |                   |                    |                       |                    |           |
| Immediate recall                         | 29.14(3.54)       | 1.05(3.58)         | 29.08(4.46)           | -0.16(3.70)        | 0.238     |
| Delayed recall                           | 10.62(1.69)       | 0.71(1.80)         | 11.08(1.32)           | 0.60(1.12)         | 0.624     |
| <b>CVMT</b>                              |                   |                    |                       |                    |           |
| Number of correct hits                   | 90.48(8.70)       | -4.67(5.01)        | 94.79(5.79)           | -1.63(4.55)        | 0.144     |
| Number of errors                         | 21.52(8.69)       | 4.67(5.01)         | 17.21(5.79)           | 1.63(4.55)         | 0.144     |
| WAIS-III-LNS                             | 11.95(2.06)       | 0.43(2.31)         | 11.88(2.01)           | 0.12(2.11)         | 0.695     |
| <b>ACT</b>                               |                   |                    |                       |                    |           |
| 18" delay                                | 11.76(3.08)       | 0.67(3.01)         | 12.12(2.9)            | 1.04(3.45)         | 0.883     |
| 36" delay                                | 10.38(3.50)       | -1.48(3.01)        | 11.24(2.86)           | -0.40(2.38)        | 0.322     |
| SRT 5" Delay,<br>response time in ms     | 363.29(118.14)    | 28.48(107.89)      | 299.68(57.89)         | -22.80(82.47)      | 0.766     |
| <b>CRT 5" Delay, response time in ms</b> |                   |                    |                       |                    |           |
| Yes                                      | 473.48(56.72)     | -10.62(83.66)      | 471.72(66.70)         | -6.36(40.58)       | 0.994     |
| No                                       | 491.52(87.32)     | 6.67(70.73)        | 480.24(84.01)         | -4.72(65.41)       | 0.419     |

Grooved Pegboard, t-score

|                   |              |             |              |             |       |
|-------------------|--------------|-------------|--------------|-------------|-------|
| Dominant hand     | 49.38(8.20)  | -0.90(7.31) | 48.72(12.05) | -2.56(9.99) | 0.665 |
| Non-dominant hand | 49.14(11.22) | -2.52(6.52) | 48.84(11.14) | -3.68(8.45) | 0.618 |

---

\* p-value for test of the difference in 12-month change between treatment groups based on ANCOVA after adjusting for age, sex, education, *APOE*  $\epsilon$ 4 status and premorbid intelligence using the Wechsler Test of Adult Reading.

HVLT-R: Hopkins Verbal Learning Test-Revised (verbal learning and memory); CVMT: Continuous Visual Memory Test (visual learning and memory); WAIS-III-LNS: Wechsler Adult Intelligence Scale-III Letter-Number Sequencing Subtest (attention and working memory); ACT: Auditory Consonant Trigrams (attention and working memory); SRT: Simple Reaction Time (psychomotor speed); CRT: Choice Reaction Time (psychomotor speed); and Grooved Pegboard (fine motor coordination and speed).
